# Supplementary material for: TAILS Identifies Candidate Substrates and Biomarkers of ADAMTS7, a Therapeutic Protease Target in Coronary Artery Disease
Source: PubMed Central journal article supplement — Mol Cell Proteomics. 2022 Mar 11;21(4):100223. doi: 10.1016/j.mcpro.2022.100223 (PMC9035411; doi:10.1016/j.mcpro.2022.100223), 2022-03-11
Supplement: mmc2.pdf [file mmc2.pdf]

**Figure S2**

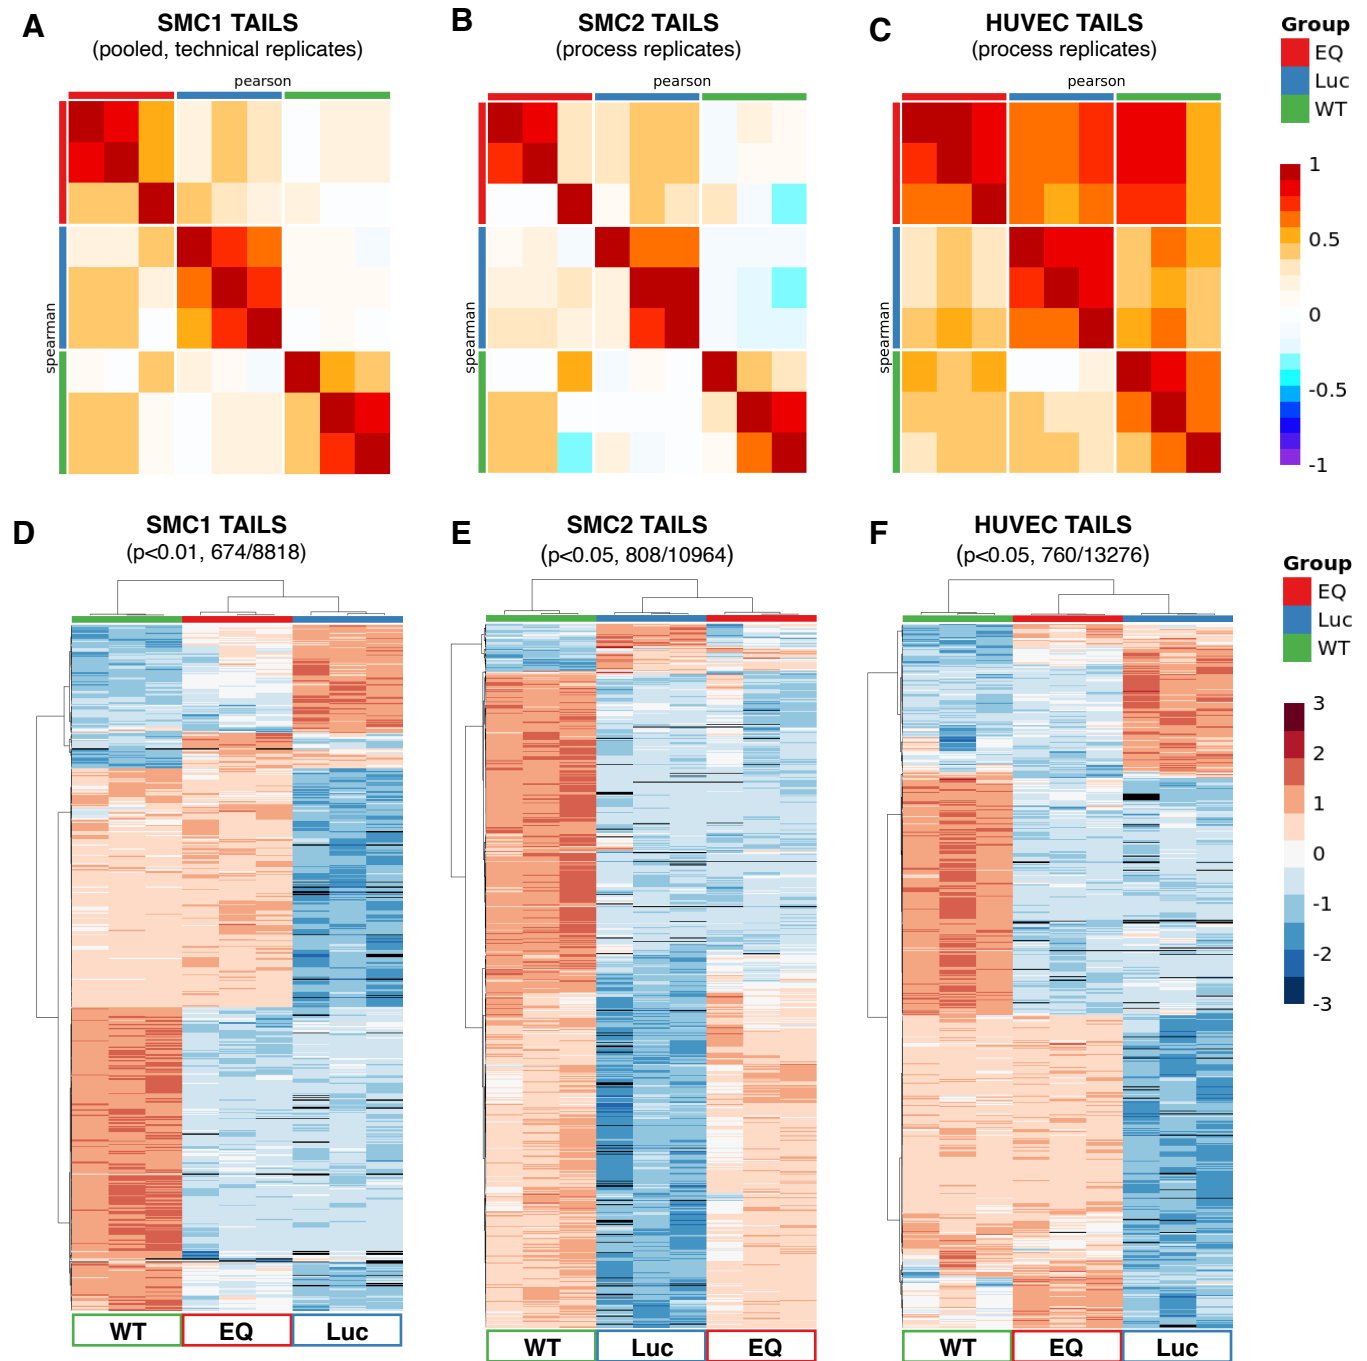

**Figure S2 TAILS replicate correlation plots and heatmaps for regulated peptides.** A-C, Similarity of TAILS experimental replicates analyzed by Pearson (linear relationships) and Spearman (monotonic relationships) correlation plots generated by Protigy. D-F, Heatmap cluster analysis of regulated peptides from TAILS experiments demonstrating greater clustering of EQ and Luc compared to WT replicates associated with ADAMTS7 activity.
