# Supplementary material for: TAILS Identifies Candidate Substrates and Biomarkers of ADAMTS7, a Therapeutic Protease Target in Coronary Artery Disease
Source: PubMed Central journal article supplement — Mol Cell Proteomics. 2022 Mar 11;21(4):100223. doi: 10.1016/j.mcpro.2022.100223 (PMC9035411; doi:10.1016/j.mcpro.2022.100223), 2022-03-11
Supplement: mmc3.pdf [file mmc3.pdf]

**Figure S3**

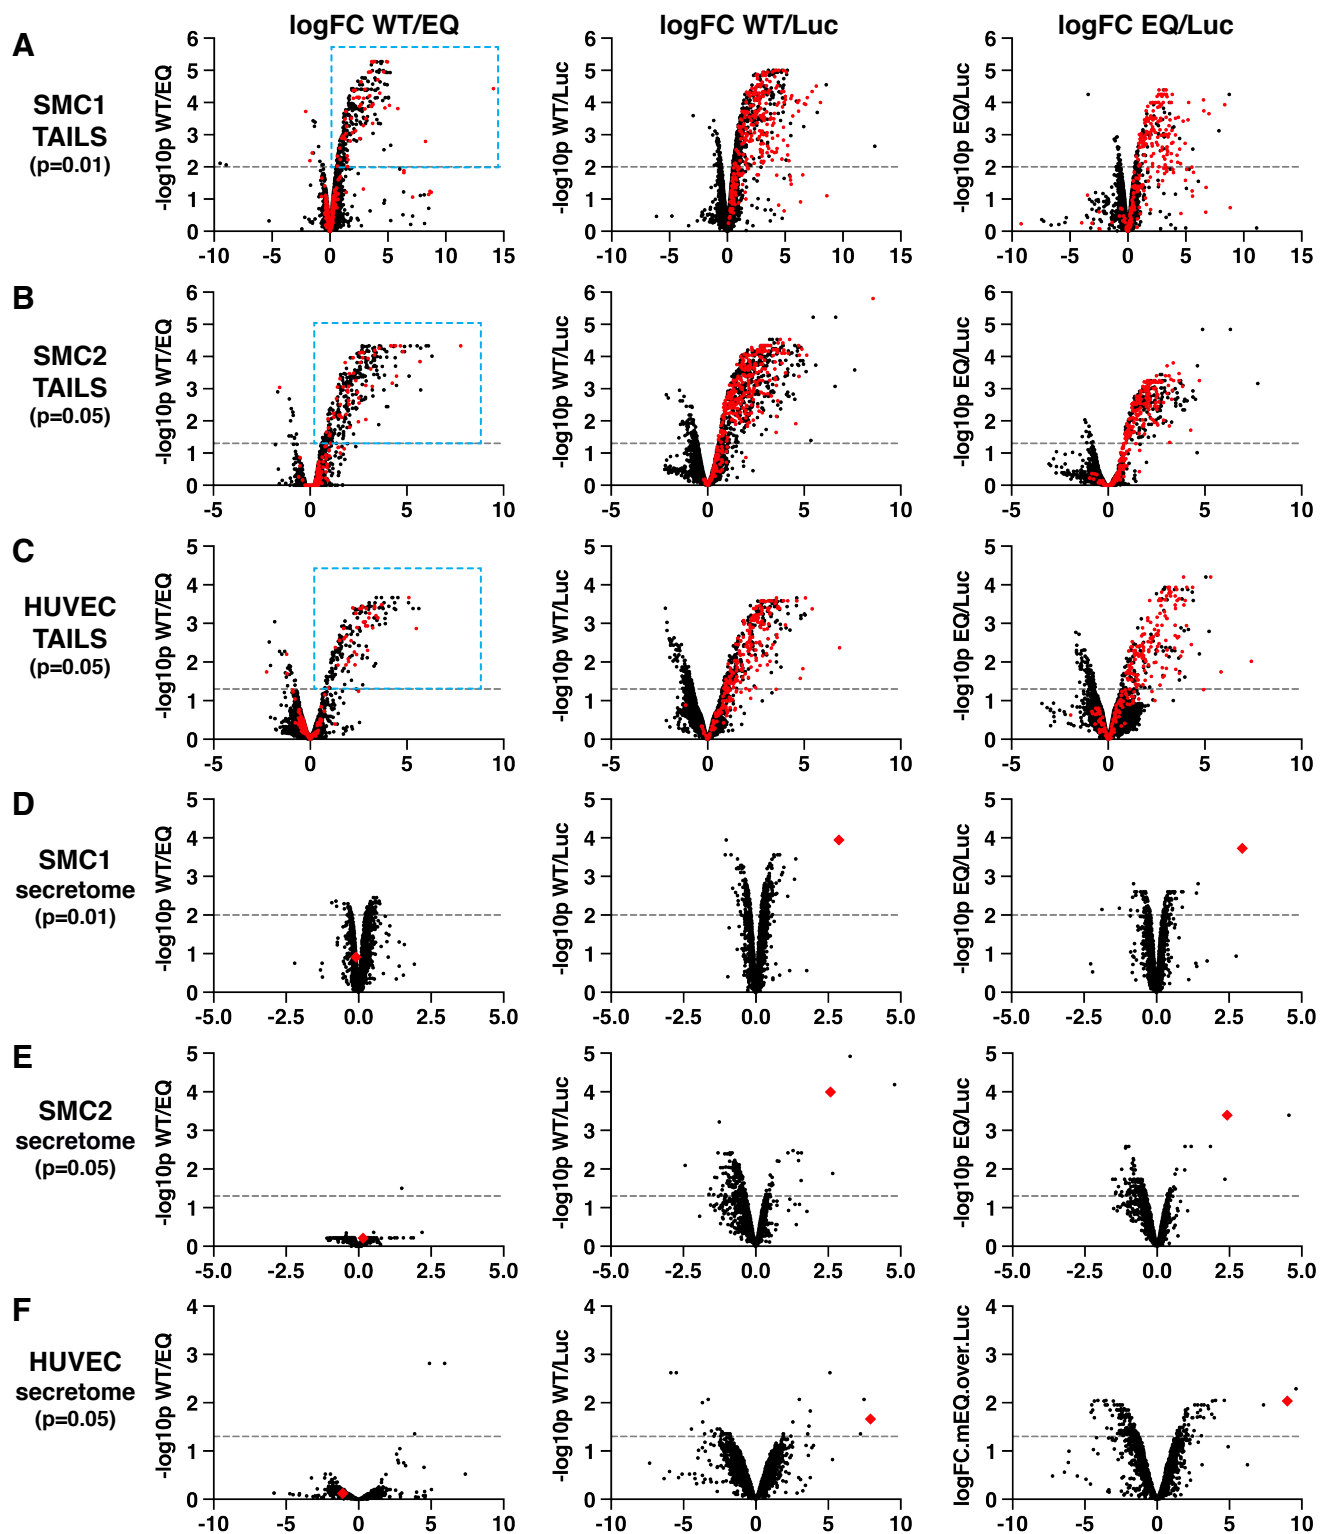

**Figure S3 Volcano plots of regulated TAILS peptides and secretome regulated proteins.** A-C, comparison of WT/EQ, WT/Luc and EQ/Luc regulated peptides from three independent TAILS experiments. A, TAILS SMC1 ( $p<0.01$ ) B, TAILS SMC2 ( $p<0.05$ ) C, TAILS HUVEC ( $p<0.05$ ). Outlier logFC values with incomplete replicate data were excluded from some SMC1 volcano plots to keep similar data ranges. Mouse ADAMTS7 peptides are shown in red. Significant WT/EQ peptides with positive logFC are boxed in cyan and represent candidate substrate cleavage sites and ADAMTS7 auto-cleavage sites. D-F, comparison of WT/EQ, WT/Luc and EQ/Luc regulated proteins from the total secretome analysis. D, TAILS SMC1 ( $p<0.01$ ) E, TAILS SMC2 ( $p<0.05$ ) F, TAILS HUVEC ( $p<0.05$ ). Mouse ADAMTS7 total protein (red diamonds) was significantly upregulated in the WT/Luc and EQ/Luc comparisons.
