# Supplementary material for: TAILS Identifies Candidate Substrates and Biomarkers of ADAMTS7, a Therapeutic Protease Target in Coronary Artery Disease
Source: PubMed Central journal article supplement — Mol Cell Proteomics. 2022 Mar 11;21(4):100223. doi: 10.1016/j.mcpro.2022.100223 (PMC9035411; doi:10.1016/j.mcpro.2022.100223), 2022-03-11
Supplement: mmc5.pdf [file mmc5.pdf]

**Figure S5**

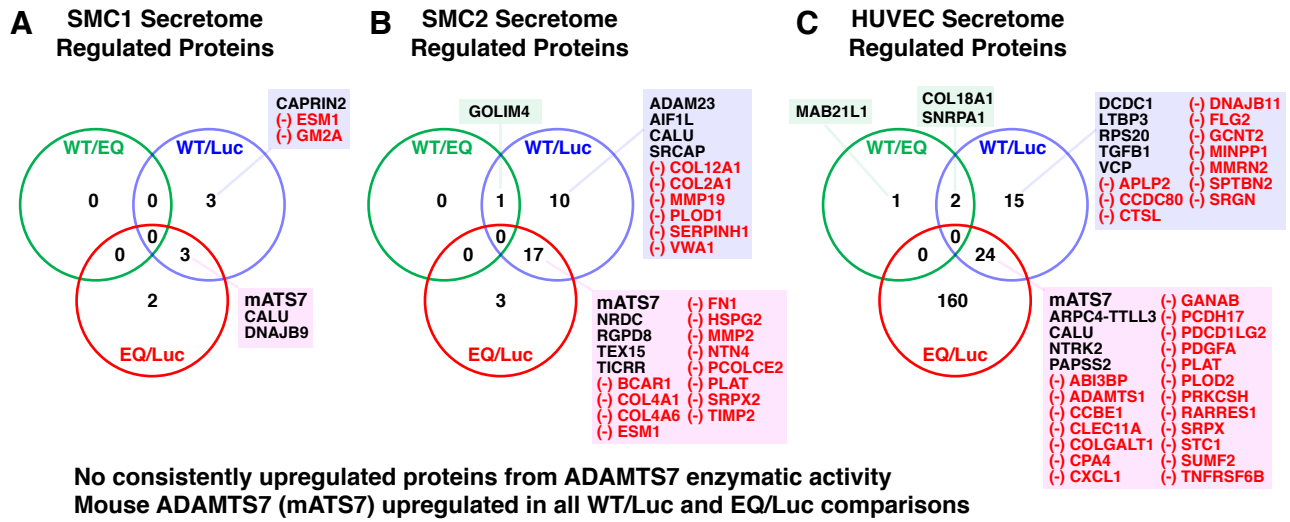

**Figure S5 Analysis of overlapping regulated proteins from each secretome experiment.** Comparison of regulated proteins within each ADAMTS7 secretome experiment. Significantly upregulated proteins ( $\log_{FC} > 1$ ) and down-regulated proteins ( $\log_{FC} < -1$ ) shown in red. List of proteins regulated in EQ/Luc alone are not shown. A. SMC1 Venn diagram, B. SMC2 Venn diagram, C. HUVEC Venn diagram.
