# Supplementary material for: TAILS Identifies Candidate Substrates and Biomarkers of ADAMTS7, a Therapeutic Protease Target in Coronary Artery Disease
Source: PubMed Central journal article supplement — Mol Cell Proteomics. 2022 Mar 11;21(4):100223. doi: 10.1016/j.mcpro.2022.100223 (PMC9035411; doi:10.1016/j.mcpro.2022.100223), 2022-03-11
Supplement: mmc7.pdf [file mmc7.pdf]

**Figure S7**

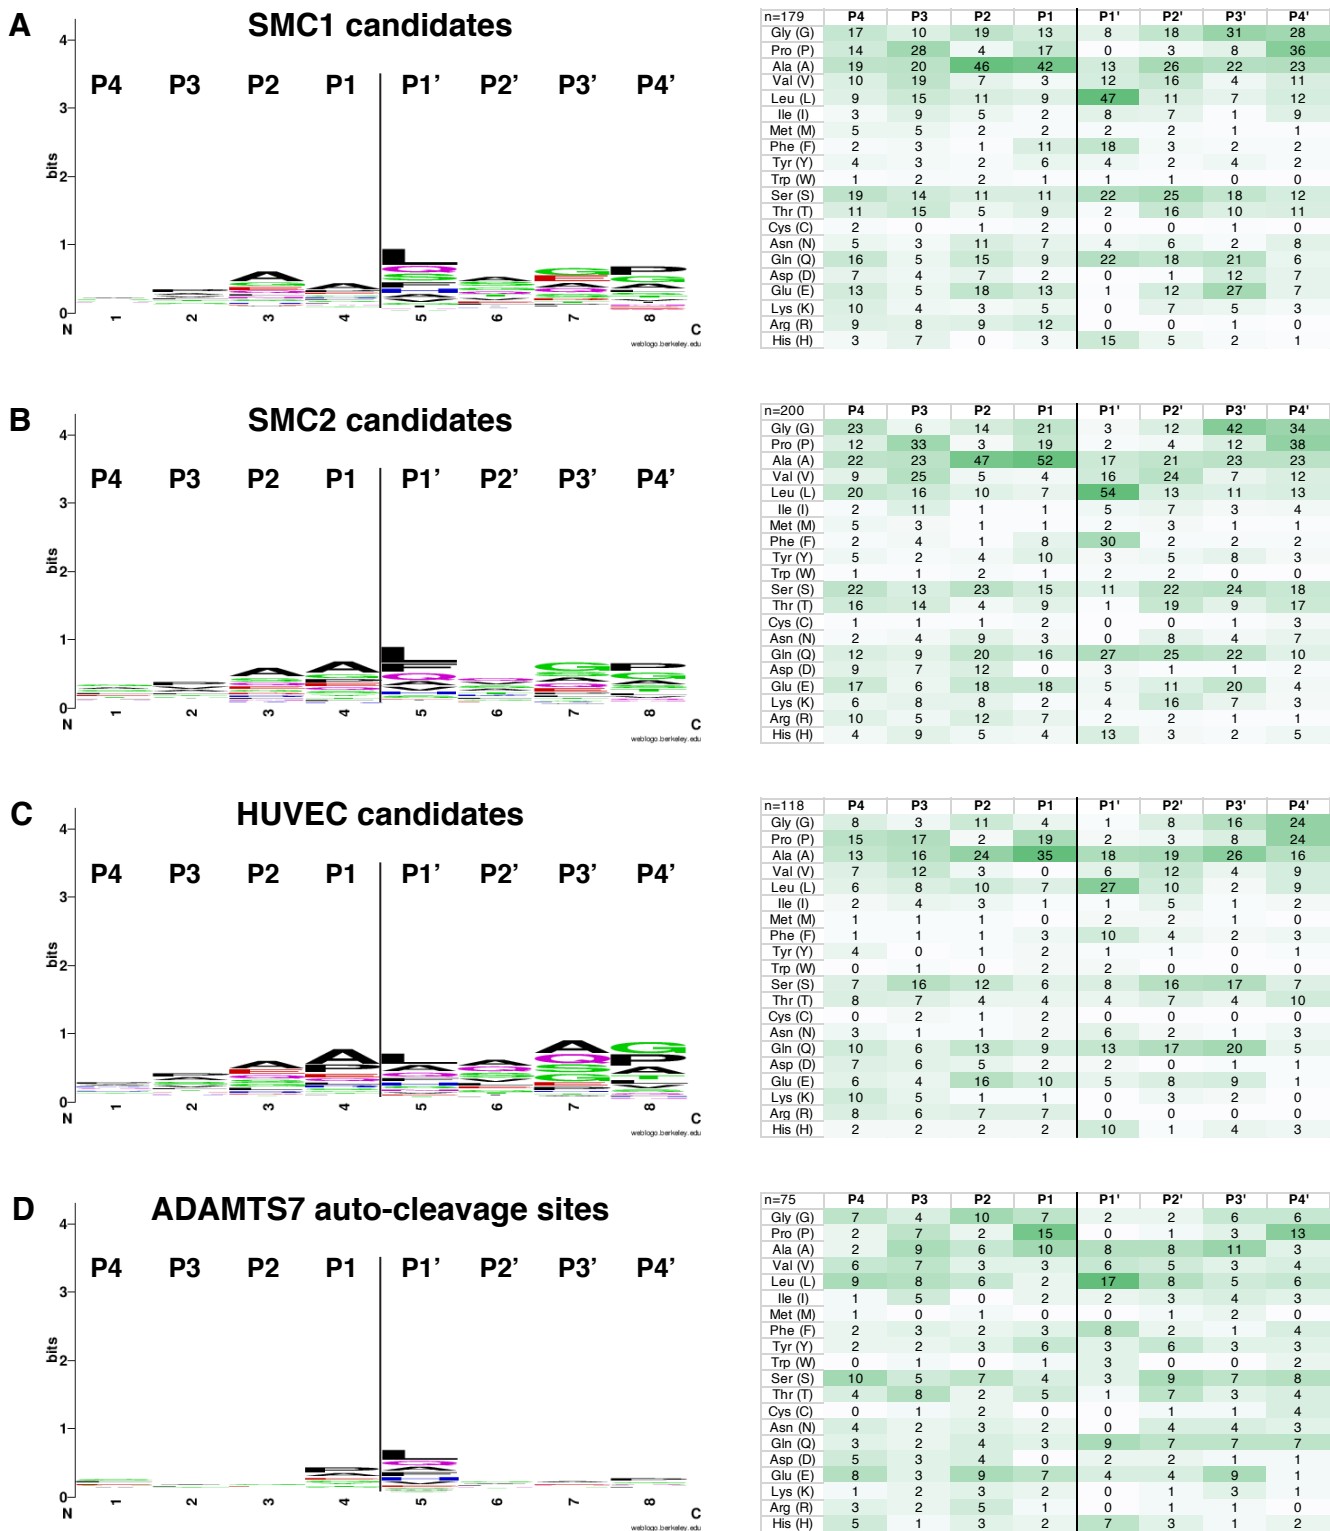

**Figure S7 ADAMTS7 cleavage site specificity from TAILS experiments.** A-D, Stringent cleavage site logo plots generated by WebLogo and amino acid counts for the TAILS high confidence candidate substrate cleavage sites and ADAMTS7 auto-cleavage sites. A, SMC1 candidates ( $p < 0.01$ ,  $+FC > 1$ ,  $n = 179$ ), B, SMC2 candidates ( $p < 0.05$ ,  $+FC > 1$ ,  $n = 200$ ), C, HUVEC candidates ( $p < 0.05$ ,  $+FC > 1$ ,  $n = 118$ ) and D, all unique ADAMTS7 auto-cleavage sites ( $n = 75$ ).
