# Supplementary material for: TAILS Identifies Candidate Substrates and Biomarkers of ADAMTS7, a Therapeutic Protease Target in Coronary Artery Disease
Source: PubMed Central journal article supplement — Mol Cell Proteomics. 2022 Mar 11;21(4):100223. doi: 10.1016/j.mcpro.2022.100223 (PMC9035411; doi:10.1016/j.mcpro.2022.100223), 2022-03-11
Supplement: mmc8.pdf [file mmc8.pdf]

**Figure S8**

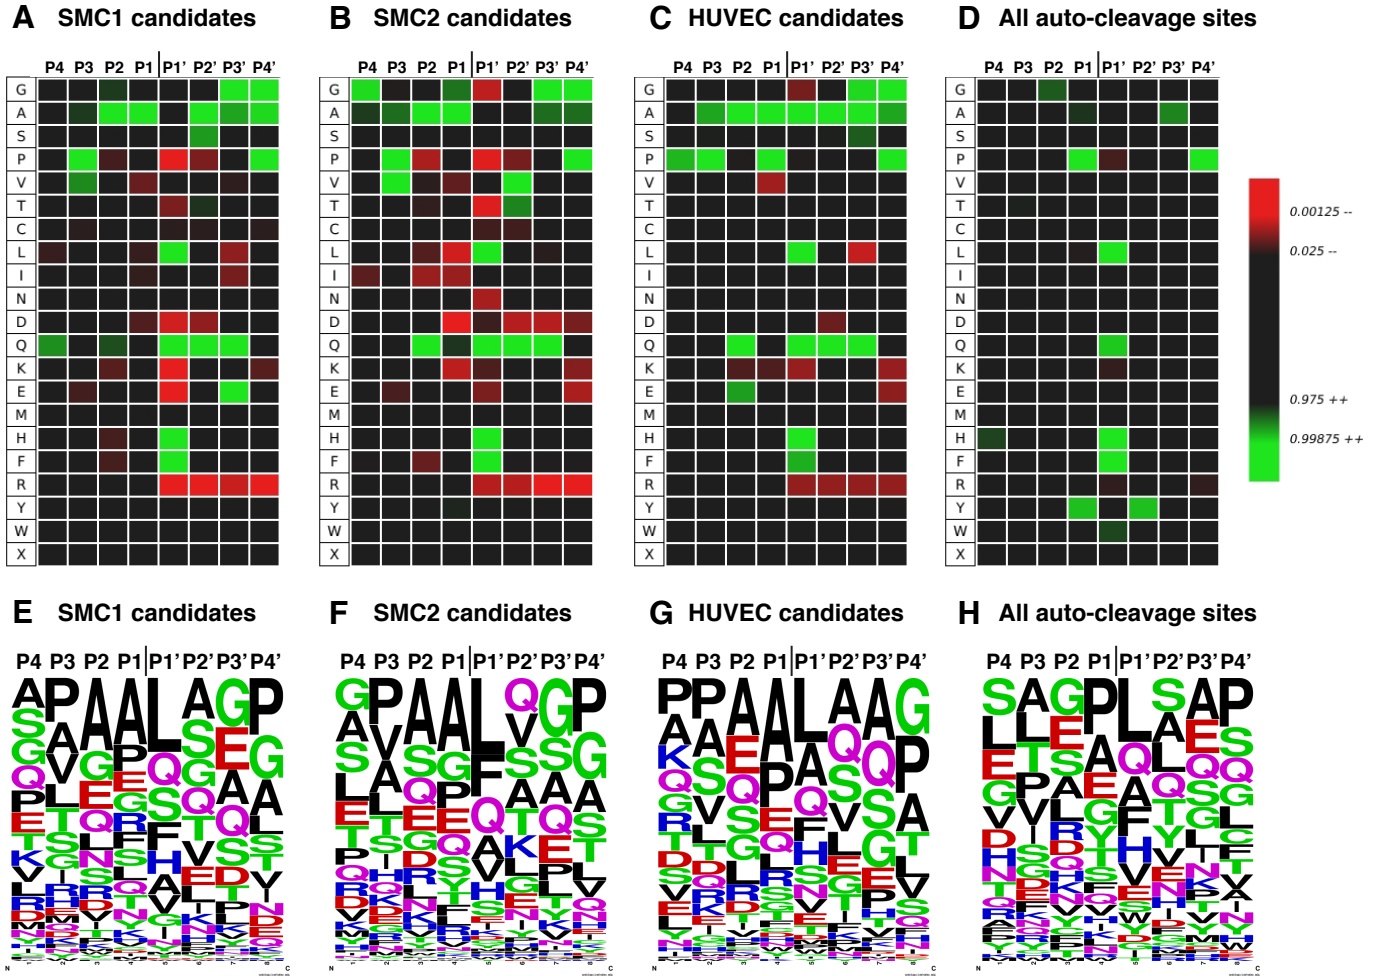

**Figure S8 TAILS high confidence substrate site specificity compared with ADAMTS7 auto-cleavage sites.** *A-D*, TAILS candidate substrate cleavage sites and ADAMTS7 auto-cleavage sites analyzed using iceLogo to generate heatmaps adjusted for the abundance of each amino acid in humans. *A*, SMC1 candidate heatmap ( $p < 0.01$ ,  $+FC > 1$ ,  $n = 179$ ), *B*, SMC2 candidate heatmap ( $p < 0.05$ ,  $+FC > 1$ ,  $n = 200$ ), *C*, HUVEC candidate heatmap ( $p < 0.05$ ,  $+FC > 1$ ,  $n = 118$ ). *D*, the heat map including all unique ADAMTS7 auto-cleavage sites ( $n = 75$ ) resembles the TAILS high confidence substrates. *G-H*, Amino acid frequency plots generated by WebLogo showing the similar distribution between experiments, however no amino acid was present more than 30% at any given position at the cleavage site.
