# Supplementary material for: TAILS Identifies Candidate Substrates and Biomarkers of ADAMTS7, a Therapeutic Protease Target in Coronary Artery Disease
Source: PubMed Central journal article supplement — Mol Cell Proteomics. 2022 Mar 11;21(4):100223. doi: 10.1016/j.mcpro.2022.100223 (PMC9035411; doi:10.1016/j.mcpro.2022.100223), 2022-03-11
Supplement: mmc9.pdf [file mmc9.pdf]

**Figure S9**

**A in vitro HA-EFEMP1 Cleavage Quantitation by LC-MS/MS**

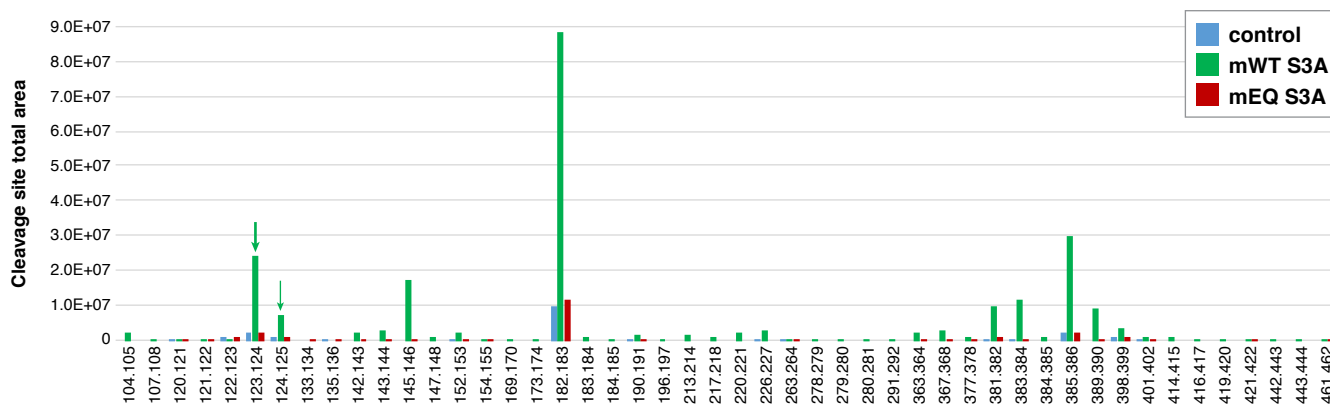

**B HA-EFEMP1 Background Cleavage**

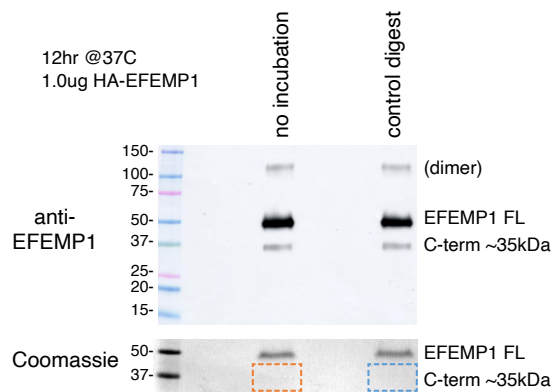

**C HA-EFEMP1 Background Cleavage Quantitation by LC-MS/MS**

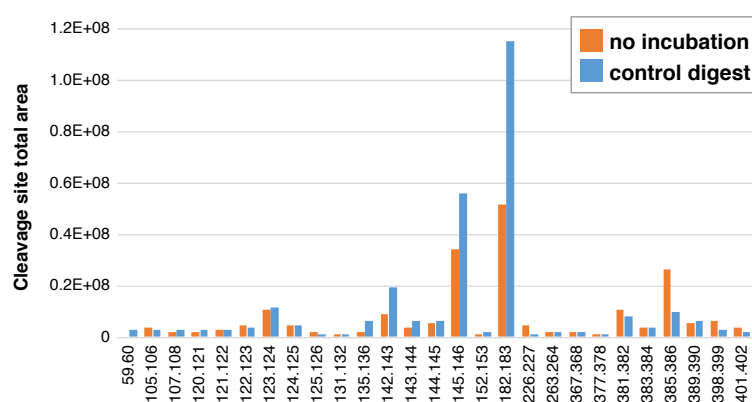

**Figure S9 Purified HA-EFEMP1 in vitro cleavage and background cleavage.** A, quantitation of semi-tryptic or semi-chymotryptic HA-EFEMP1 peptides from the ADAMTS7 in vitro cleavage assay. A subset of this data at the atypical EGF1 repeat was presented in Figure 7. ADAMTS7 specific cleavage sites at 123.124 and 124.125 are indicated by green arrows. B, background cleavage in purified HA-EFEMP1 within the atypical EGF1 repeat in the absence of enzyme shown by western blot under non-reducing conditions. A region below the full-length HA-EFEMP1 was excised from a parallel Coomassie stained non-reducing gel and sent off for LC-MS/MS identification of EFEMP1 peptides. C, quantitation of semi-tryptic or semi-chymotryptic peptides showing background cleavage from the commercial purified HA-EFEMP1 protein. Background cleavage at positions 123.124 and 124.125 were detected and did not increase in abundance after overnight digestion in control conditions.
