# Supplementary material for: TAILS Identifies Candidate Substrates and Biomarkers of ADAMTS7, a Therapeutic Protease Target in Coronary Artery Disease
Source: PubMed Central journal article supplement — Mol Cell Proteomics. 2022 Mar 11;21(4):100223. doi: 10.1016/j.mcpro.2022.100223 (PMC9035411; doi:10.1016/j.mcpro.2022.100223), 2022-03-11
Supplement: mmc10.pdf [file mmc10.pdf]

**Supplementary Table 1 Quantitation statistics of the large scale SMC and HUVEC TAILS**

**experiments.** TMT labeled peptides filtered for redundancy, species, and DeltaForwtoRev > 0.

Peptides with unmodified or acetylated N-termini containing internal TMT labeled lysine

residues were also included in the analysis.

|                                        | <b>SMC1</b> |             | <b>SMC2</b>  |             | <b>HUVEC</b> |             |
|----------------------------------------|-------------|-------------|--------------|-------------|--------------|-------------|
|                                        | Peptides    | Proteins    | Peptides     | Proteins    | Peptides     | Proteins    |
| Quantified TMT labeled peptides        | <b>8818</b> | <b>3152</b> | <b>10964</b> | <b>3579</b> | <b>13276</b> | <b>3826</b> |
| Peptides N-terminally labeled with TMT | 7325        | 2618        | 6482         | 2349        | 7716         | 2685        |
| Peptides with unmodified N-termini     | 926         | 483         | 3579         | 1231        | 4873         | 1567        |
| N-terminally acetylated peptides       | 567         | 529         | 903          | 831         | 687          | 636         |
