# Supplementary material for: TAILS Identifies Candidate Substrates and Biomarkers of ADAMTS7, a Therapeutic Protease Target in Coronary Artery Disease
Source: PubMed Central journal article supplement — Mol Cell Proteomics. 2022 Mar 11;21(4):100223. doi: 10.1016/j.mcpro.2022.100223 (PMC9035411; doi:10.1016/j.mcpro.2022.100223), 2022-03-11
Supplement: mmc13.pdf [file mmc13.pdf]

**Supplementary Table 4 Summary of regulated peptides in SMC and HUVEC TAILS**

**experiments.** Significantly regulated quantitated peptides from WT/EQ, WT/Luc and EQ/Luc comparisons presented from each TAILS experiment. Positive Log fold change (FC+) and negative Log fold change (FC-) regulated peptides indicate significantly upregulated or downregulated peptides from each comparison. After removal of ADAMTS7 peptides, the candidate FC+ represent potential ADAMTS7 substrate cleavage sites. High confidence candidates were present in both WT/EQ and WT/Luc comparisons from each TAILS experiment.

|                    | <b>8818 SMC1 p&lt;0.01</b> |               |               | <b>10964 SMC2 p&lt;0.05</b> |               |               | <b>13276 HUVEC p&lt;0.05</b> |               |               |
|--------------------|----------------------------|---------------|---------------|-----------------------------|---------------|---------------|------------------------------|---------------|---------------|
|                    | <b>WT/EQ</b>               | <b>WT/Luc</b> | <b>EQ/Luc</b> | <b>WT/EQ</b>                | <b>WT/Luc</b> | <b>EQ/Luc</b> | <b>WT/EQ</b>                 | <b>WT/Luc</b> | <b>EQ/Luc</b> |
| <b>Significant</b> | <b>312</b>                 | 646           | 217           | <b>314</b>                  | 755           | 333           | <b>213</b>                   | 524           | 349           |
| All LogFC+         | 297                        | 590           | 194           | 302                         | 681           | 321           | 191                          | 376           | 251           |
| All LogFC-         | 15                         | 56            | 23            | 12                          | 74            | 12            | 22                           | 148           | 98            |
| ADAMTS7 FC+        | <b>57</b>                  | 201           | 133           | <b>54</b>                   | 250           | 157           | <b>36</b>                    | 157           | 136           |
| ADAMTS7 FC-        | 3                          | 0             | 0             | 1                           | 0             | 0             | 3                            | 1             | 0             |
| Candidates FC+     | <b>240</b>                 | 389           | 61            | <b>248</b>                  | 431           | 164           | <b>155</b>                   | 219           | 115           |
| Candidates FC-     | 12                         | 56            | 23            | 11                          | 74            | 12            | 19                           | 147           | 98            |
| Dup Cand FC+       | 2                          | 3             | 0             | 3                           | 4             | 0             | 1                            | 1             | 1             |
| Novel Cand FC+     | <b>238</b>                 | 386           | 61            | <b>245</b>                  | 427           | 164           | <b>154</b>                   | 218           | 114           |
| High confidence    | <b>207</b>                 |               |               | <b>210</b>                  |               |               | <b>127</b>                   |               |               |
